# Supplementary material for: Loss-of-Function Variant in the SMPD1 Gene in Progressive Supranuclear Palsy-Richardson Syndrome Patients of Chinese Ancestry
Source: PubMed Central journal article supplement — J Mov Disord. 2024 Jan 31;17(2):213–7. doi: 10.14802/jmd.24009 (PMC11082598; doi:10.14802/jmd.24009), 2024-01-31
Supplement: jmd-24009-Supplementary-Fig-1.pdf [file jmd-24009-Supplementary-Fig-1.pdf]

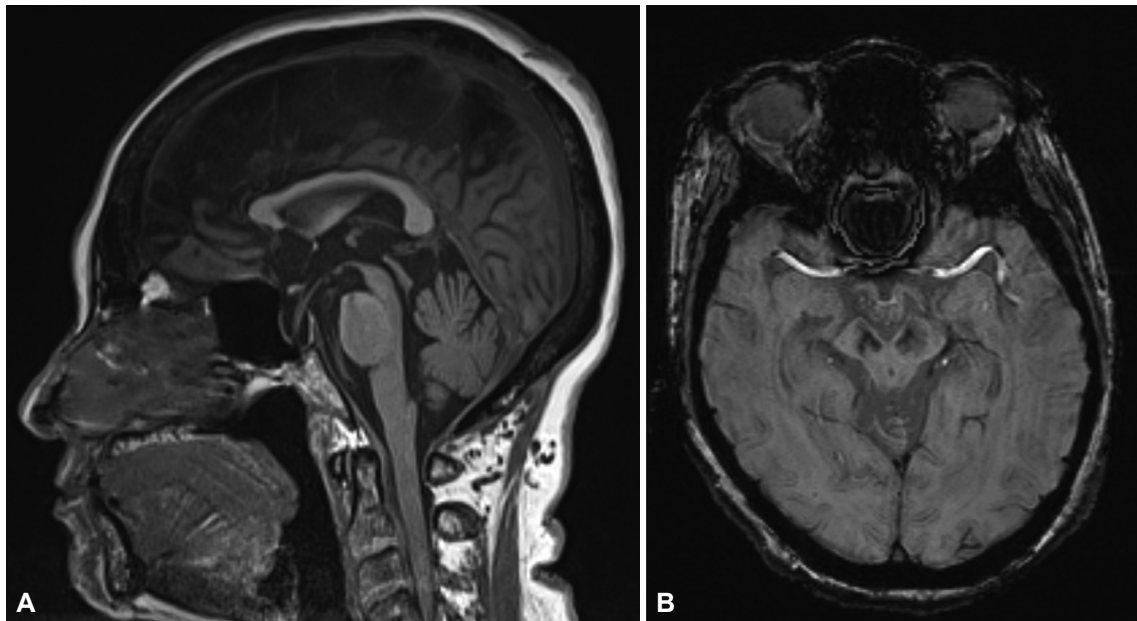

**Supplementary Figure 1.** Brain MRI of Case 1, done in April 2021. This showed flattening and even slight concavity of the upper midbrain border (i.e., a mild “hummingbird sign”) on mid-sagittal T1 image (A). The axial susceptibility-weighted imaging (B) showed lateral concavity of the midbrain (“morning glory sign”). MRI, magnetic resonance imaging.
