# Supplementary material for: Loss-of-Function Variant in the SMPD1 Gene in Progressive Supranuclear Palsy-Richardson Syndrome Patients of Chinese Ancestry
Source: PubMed Central journal article supplement — J Mov Disord. 2024 Jan 31;17(2):213–7. doi: 10.14802/jmd.24009 (PMC11082598; doi:10.14802/jmd.24009), 2024-01-31
Supplement: jmd-24009-Supplementary-Material.pdf [file jmd-24009-Supplementary-Material.pdf]

## **SUPPLEMENTARY MATERIAL**

The WES dataset was first queried for 200 neurodegenerative disease-related genes which included FTD- and PSP-related genes (*GRN*, *MAPT*, *TBK1*, *TARDBP*, *VCP*, *SQSTM1*, and *CHMP2B*). Subsequently, other genes associated with PSP were also queried (*STX6*, *EIF2AK3*, *MOBP*, *DCTN1*, *SYNJ1*, *FUS*, *VCP*, *CHMP2B*, *APP*, *PSEN1*, *PSEN2*, *ATP13A2*, *ATN1*, *NPC1/2*, *PRKN*, *DUSP10*, *SLCO1A2*, *CXCR4*, *BSN*, *LRP10*, *KANK2*, *DDR2*, *STOM*, *CLU*, *KANSL1*, and *C4A*).
